# Supplementary material for: Characterization of Intact Neo-Glycoproteins by Hydrophilic Interaction Liquid Chromatography
Source: PubMed Central journal article supplement (PMC6271321; doi:10.3390/molecules19079070), 2014-06-30

# Supporting Information

**Table S1.** Details on RNase A – Man reactions samples and replicates reported in Table 1 (Sample 1 at T = 37 °C and Sample 2 at 25 °C).

| Sample | n °Man Units (%) |           |           |           |           |          |      |      |           | Man/Protein Ratio (mole/mole) |
|--------|------------------|-----------|-----------|-----------|-----------|----------|------|------|-----------|-------------------------------|
|        | 0                | 1         | 2         | 3         | 4         | 5        | 6    | 7    | %C        |                               |
| 37 °C  |                  |           |           |           |           |          |      |      |           |                               |
| 1      | 4.2              | 15.1      | 27.7      | 28.4      | 18.6      | 6.0      | n.d. | n.d. | 95.8      | 2.6                           |
| 2      | 5.4              | 16.5      | 27.6      | 28.6      | 16.2      | 5.7      | n.d. | n.d. | 94.6      | 2.5                           |
| 3      | 6.9              | 20.4      | 29.7      | 21.7      | 14.1      | 7.2      | n.d. | n.d. | 93.1      | 2.4                           |
|        | 5.5 ±1.3         | 17.3 ±2.7 | 28.3 ±1.2 | 26.2 ±3.9 | 16.3 ±2.3 | 6.3 ±0.8 | -    | -    | 94.5 ±1.3 | 2.5 ±0.1                      |

  

| Sample | n °Man Units (%) |          |           |           |           |           |           |          |       | Man/Protein Ratio (mole/mole) |
|--------|------------------|----------|-----------|-----------|-----------|-----------|-----------|----------|-------|-------------------------------|
|        | 0                | 1        | 2         | 3         | 4         | 5         | 6         | 7        | %C    |                               |
| 25 °C  |                  |          |           |           |           |           |           |          |       |                               |
| 1      | n.d.             | 2.0      | 9.3       | 16.2      | 24.8      | 22.7      | 15.6      | 9.5      | 100.0 | 4.4                           |
| 2      | n.d.             | 2.7      | 9.9       | 16.7      | 24.5      | 22.4      | 15.3      | 8.5      | 100.0 | 4.3                           |
| 3      | n.d.             | 4.5      | 11.4      | 19.2      | 24.3      | 19.4      | 13.6      | 7.5      | 100.0 | 4.1                           |
| 4      | n.d.             | 6.9      | 14.9      | 22.5      | 24.8      | 16.8      | 9.9       | 4.1      | 100.0 | 3.8                           |
|        | -                | 4.0 ±2.2 | 11.4 ±2.5 | 18.6 ±2.9 | 24.6 ±0.3 | 20.3 ±2.8 | 13.6 ±2.6 | 7.4 ±2.3 | 100.0 | 4.2 ±0.3                      |

**Figure S1.** ESI-MS deconvoluted spectrum, identity and relative abundance of commercial RNase B glycoforms. Sample conc. (0.3 mg/mL) in acetonitrile/water (50:50, v/v) with 0.05% TFA, FIA analysis carried out under conditions reported in Section 3.5.

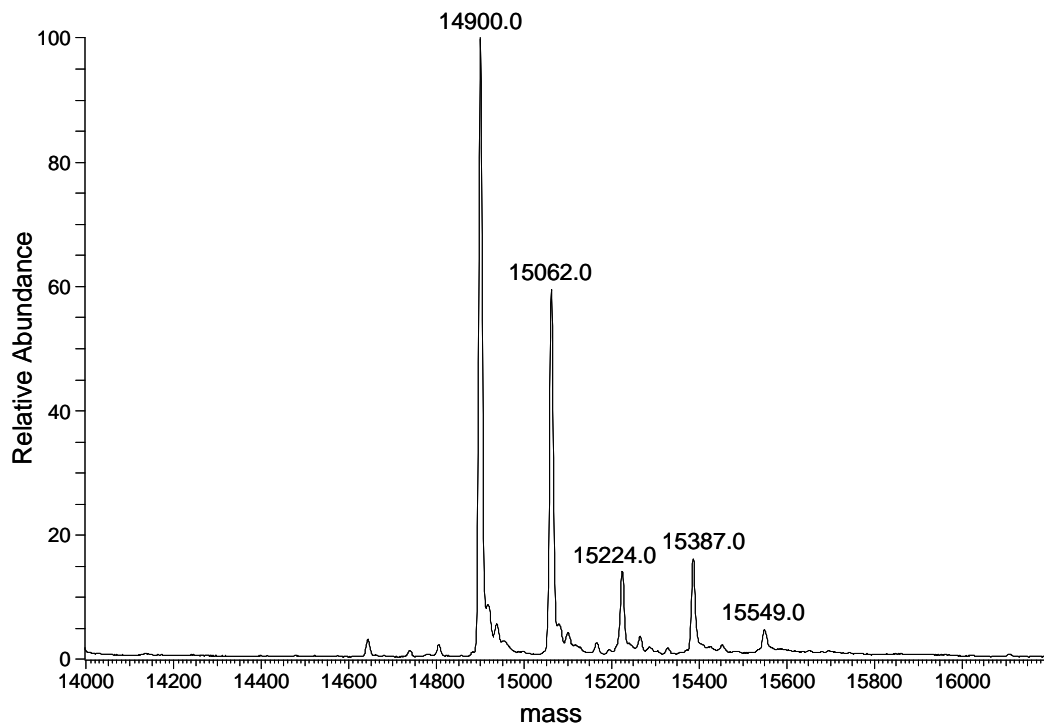

**Figure S2.** Analyses of RNase B 0.5 mg/mL dissolved in acetonitrile/water (90:10, v/v) in presence of HClO<sub>4</sub> 10 mM and analyzed at different injection volumes (2, 5 and 10  $\mu$ L).

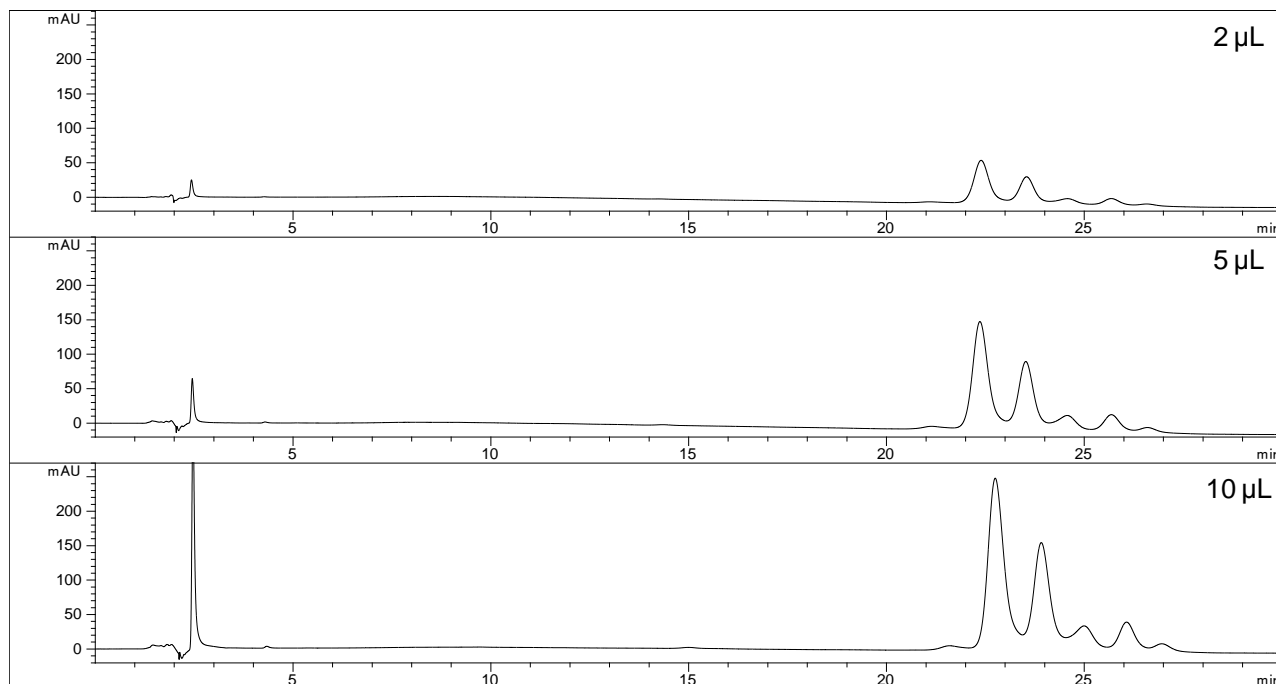

|             | GlcNAc <sub>2</sub> Man <sub>5</sub> | GlcNAc <sub>2</sub> Man <sub>6</sub> | GlcNAc <sub>2</sub> Man <sub>7</sub> | GlcNAc <sub>2</sub> Man <sub>8</sub> | GlcNAc <sub>2</sub> Man <sub>9</sub> |
|-------------|--------------------------------------|--------------------------------------|--------------------------------------|--------------------------------------|--------------------------------------|
| MW (Da)     | 14,900.0                             | 15,062.0                             | 15,224.0                             | 15,387.0                             | 15,549.0                             |
| Intensity   | 100                                  | 59.5                                 | 14                                   | 16                                   | 5                                    |
| Abundance % | 52.2                                 | 30.9                                 | 6.9                                  | 7.9                                  | 2.1                                  |

**Figure S3.** Analyses of RNase B 0.5 mg/mL dissolved in acetonitrile/water (50:50, v/v) in presence of HClO<sub>4</sub> 10 mM and analyzed at different injection volumes (2, 5 and 10  $\mu$ L).

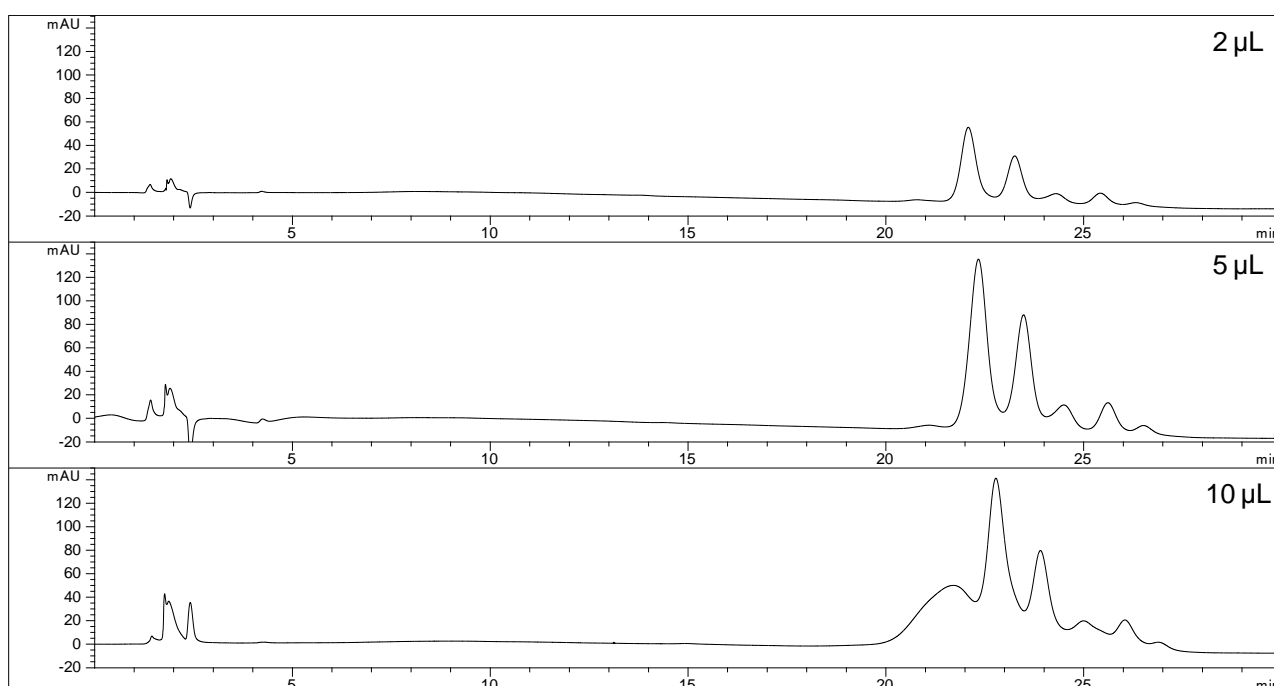

**Figure S4.** ESI-MS<sup>2</sup> and MS<sup>3</sup> spectra of ions  $m/z = 617.17$  (Panel A and B) and  $m/z = 558.16$  (Panel C and D).

A)

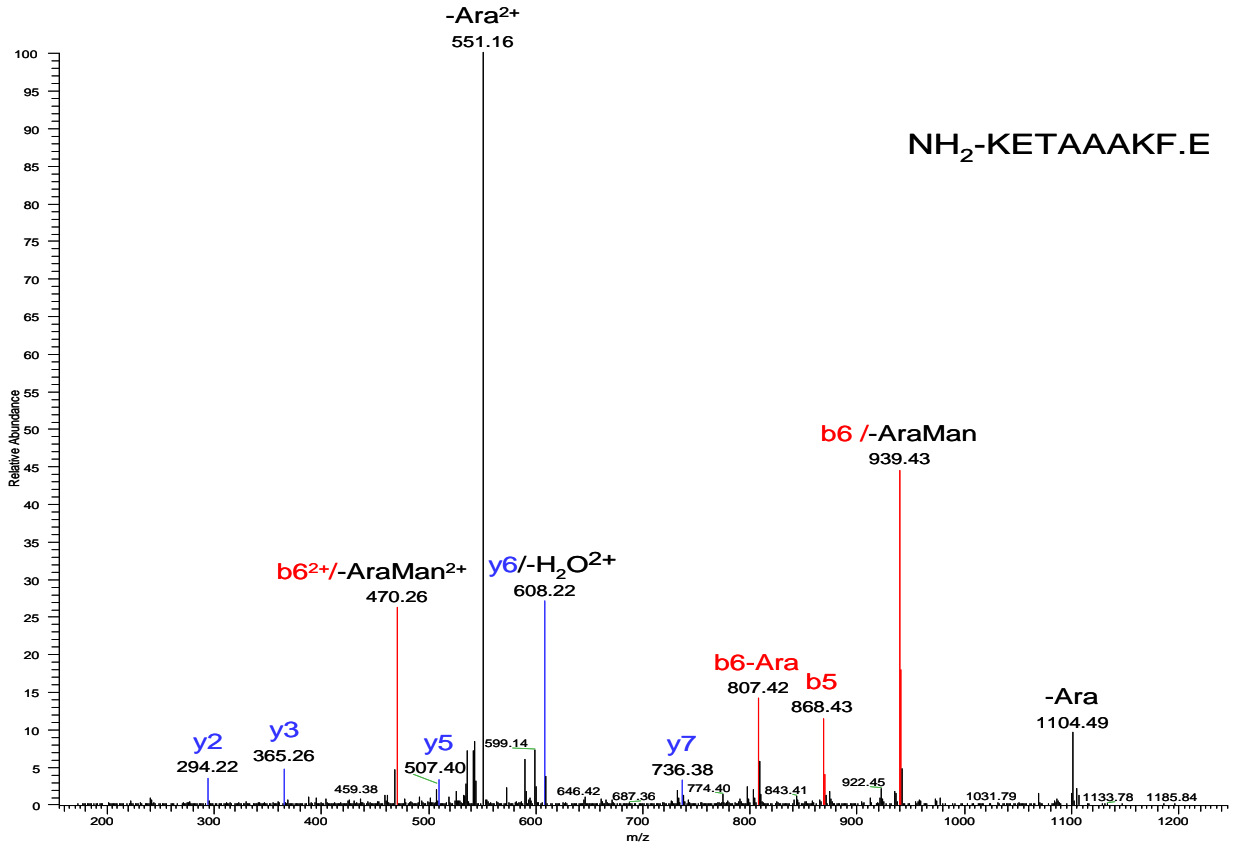

B)

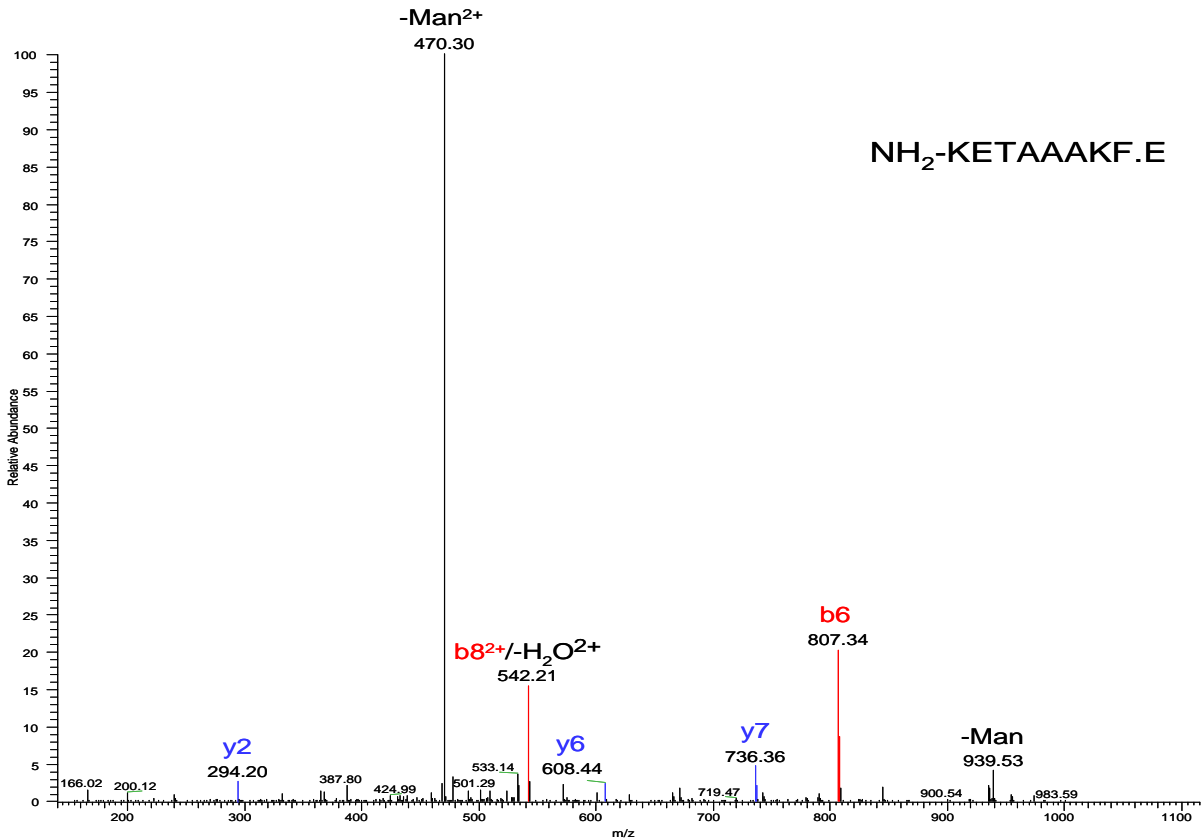

Figure S4. Cont.

C)

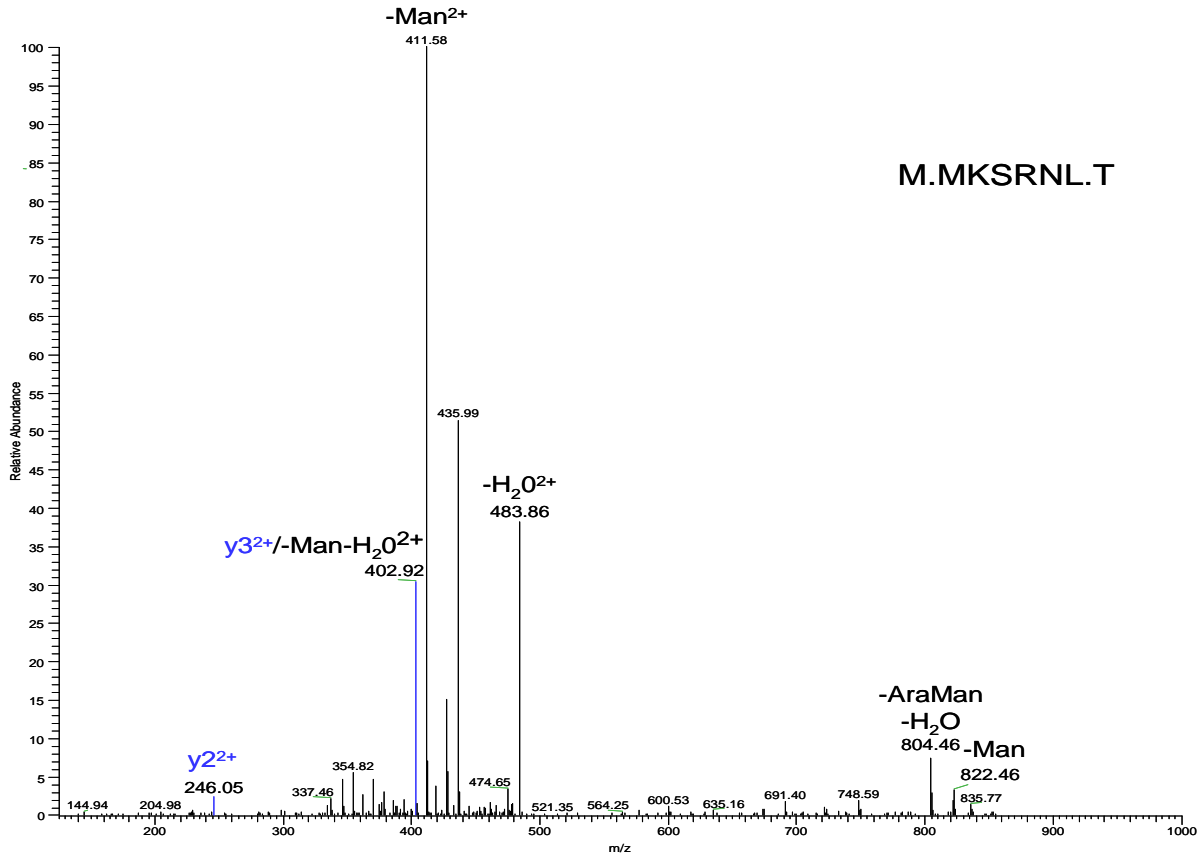

D)

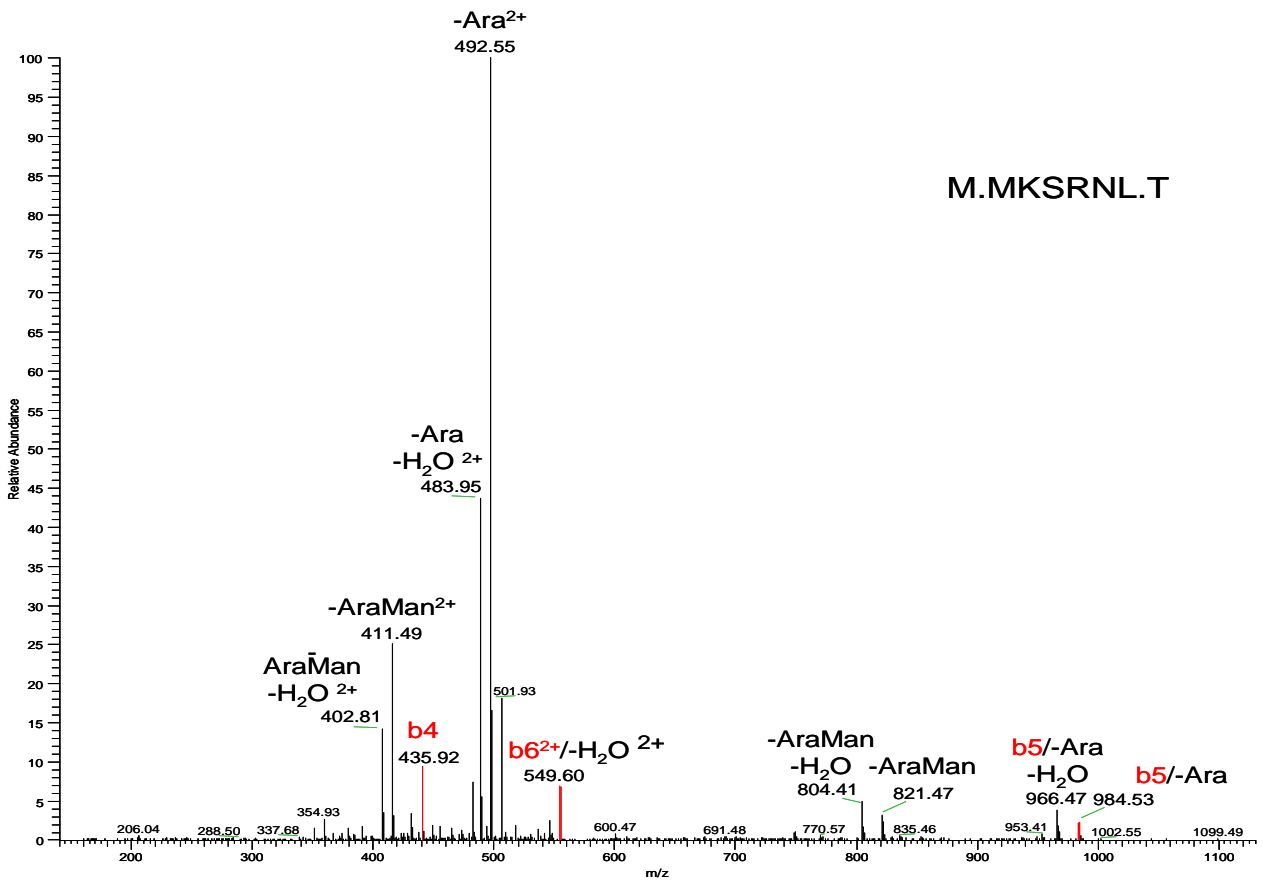

Supplement: molecules-19-09070-s001.pdf [file molecules-19-09070-s001.pdf]
